# Supplementary material
Source: PubMed Central journal article supplement (PMC7747140)
Supplement: 40820_2017_149_MOESM1_ESM.pdf [file 40820_2017_149_MOESM1_ESM.pdf]

## Supporting Information for

# Synergistic Effects in CNTs-PdAu/Pt Trimetallic Nanoparticles with High Electrocatalytic Activity and Stability

Xin-Lei Cai<sup>1</sup>, Chang-Hai Liu<sup>2,\*</sup>, Jie Liu<sup>1</sup>, Ying Lu<sup>1</sup>, Ya-Nan Zhong<sup>1</sup>, Kai-Qi Nie<sup>1</sup>, Jian-Long Xu<sup>1</sup>, Xu Gao<sup>1</sup>, Xu-Hui Sun<sup>1</sup>, Sui-Dong Wang<sup>1,\*</sup>

<sup>1</sup>Institute of Functional Nano & Soft Materials (FUNSOM), Jiangsu Key Laboratory for Carbon-Based Functional Materials & Devices, Soochow University, Suzhou, Jiangsu 215123, People's Republic of China

<sup>2</sup>School of Materials Science & Engineering, Jiangsu Collaborative Innovation Center of Photovoltaic Science and Engineering, Changzhou University, Changzhou, Jiangsu 213164, People's Republic of China

\*Corresponding authors. E-mail: wangsd@suda.edu.cn, liuch@cczu.edu.cn

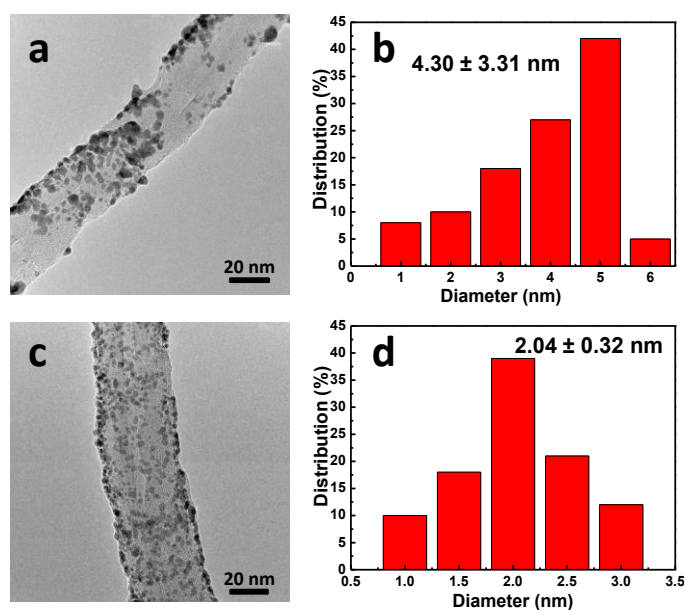

Fig. S1 TEM images and size distribution of: **a** and **b** CNTs-Au/Pt NPs, and **c** and **d** Pd/Pt NPs

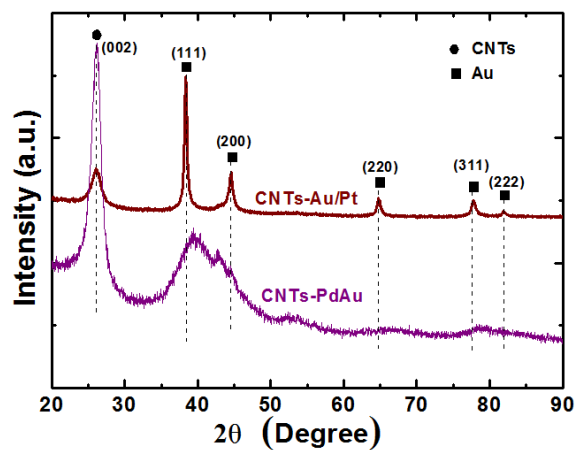

Fig. S2 XRD patterns of CNTs-Au/Pt NPs and Pd/Au NPs

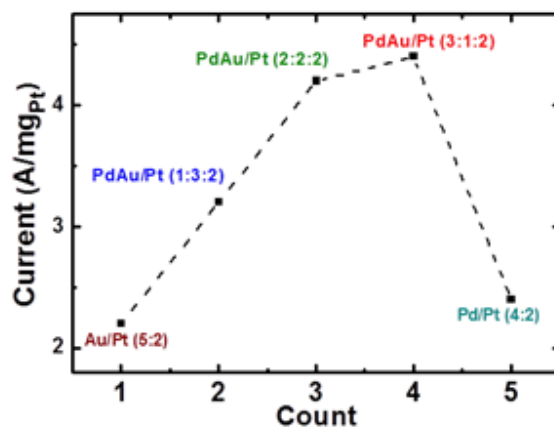

Fig. S3 Volcano plot between current and different kinds of CNTs-supported alloy catalysts
